# Supplementary material for: An experimental and theoretical mechanistic study of biexciton quantum yield enhancement in single quantum dots near gold nanoparticles
Source: Royal Society of Chemistry journal article supplement (doi:10.1039/c5nr00274e), 2015-01-01
Supplement: c5nr00274e1.pdf [file c5nr00274e1.pdf]

Supporting information

# An Experimental and Theoretical Mechanistic Study of Biexciton Quantum Yield Enhancement in Single Quantum Dots near Gold Nanoparticles

*Swayandipta Dey<sup>†</sup>, Yadong Zhou<sup>‡</sup>, Xiangdong Tian<sup>†</sup>, Julie Jenkins<sup>†</sup>, Ou Chen<sup>§</sup>, Shengli Zou<sup>‡</sup>,  
Jing Zhao<sup>†#\*</sup>*

<sup>†</sup>Department of Chemistry, University of Connecticut, 55 North Eagleville Rd, Storrs, CT,  
06269-3060, USA

<sup>‡</sup>Department of Chemistry, University of Central Florida, 4111 Libra Drive, Orlando, Florida  
32816-2366, USA

<sup>§</sup> Department of Chemistry, Massachusetts Institute of Technology, 77 Massachusetts Avenue,  
Cambridge, MA 02139, USA

<sup>#</sup>Institute of Materials Science, University of Connecticut, Storrs, CT, 06269-3136, USA

\* Address Correspondence to: [jing.zhao@uconn.edu](mailto:jing.zhao@uconn.edu) (J. Z.)

# 1. Calculations of average photons absorbed, <N>

The absorption cross-section  $C_{abs}(\omega)$  of CdSe/CdS quantum dots(QDs) is calculated using the equations developed earlier by Leatherdale et al<sup>1</sup>:

$$C_{abs}(\omega) = \frac{\omega}{m_3 c} |f(\omega)|^2 |2n_1 k_1 \frac{4}{3} \pi R^3| = \frac{1}{\lambda m_3} |f(\omega)|^2 |2n_1 k_1 \frac{4}{3} \pi R^3| = \zeta R^3$$

$$f(\omega) = \frac{3m_3^2}{m_1^2 + 2m_3^2}$$

where  $n_1, k_1$  are the real and imaginary part of the bulk absorption coefficient,  $R$  is the radius of the QD and  $m_3$ , is the refractive index(R.I.) of the medium (Toluene, RI = 1.496 at 20 °C). The parameter  $f$  is the local field factor where  $m_1 = n_1 + ik_1$  is the complex R.I. of the QD.

For the core/shell QDs, the absorption cross-section is averaged over the QD volume as reported earlier<sup>2, 3</sup>:

$$C_{abs}(\omega) = \zeta_{\omega}^{core} R_c^3 + \zeta_{\omega}^{shell} [(R_c + T_s)^3 - R_c^3] = \zeta_{\omega}^{shell} [(R_c + T_s)^3] + (\zeta_{\omega}^{core} - \zeta_{\omega}^{shell}) R_c^3$$

where  $R_c$  = radius of the CdSe core,  $R_s$  = thickness of the CdS shell.

For our CdSe/CdS QDs,  $R_c = 1.5\text{nm}$  and  $T_s = 3\text{nm}$  and the refractive indices of CdSe and CdS are obtained from Palik et al<sup>4</sup>.

Under 532 nm excitation,  $\zeta_{\omega}^{core} = 4.3141 \times 10^4 \text{ cm}^{-1}$  and  $\zeta_{\omega}^{shell} = 2.6326 \times 10^4 \text{ cm}^{-1}$ .

Using the above equations for the absorption cross-section of the CdSe/CdS QDs, the calculated  $C_{abs}(\omega)$  at 532nm =  $2.4557 \times 10^{-15} \text{ cm}^2$ .

For the single QD measurements, we assume the spot size to be diffraction limited.

Therefore, the spot size =  $\frac{1.22 \times \lambda}{NA} = 7.823 \times 10^{-9} \text{ cm}^2$  (where NA = 1.30 for the objective used).

The excitation rate =  $\frac{C_{abs} \times \text{excitation power}}{E_{\text{photon}} \times \text{spot size}} = 4.207 \times 10^4 \text{ sec}^{-1}$  where the excitation power we used for our study is 50nW.

The excitation power density is =  $\frac{50 \times 10^{-9} \text{ W}}{7.823 \times 10^{-9} \text{ cm}^2} = 6.4 \text{ W/cm}^2$

And, the average photon absorbed per exciton lifecycle,

$$\langle N \rangle = \text{excitation rate} \times \text{PL lifetime } (\tau) = 4.207 \times 10^4 \text{ sec}^{-1} \times 38 \times 10^{-9} \text{ sec} \approx 0.0015$$

The ensemble PL lifetime ( $\tau$ ) of the CdSe/CdS QDs on the glass substrate was obtained by fitting the decay in Figure 5 (black curve) with a single exponential decay function.

## 2. SEM, TEM and extinction of Au@SiO<sub>2</sub>-5 nm substrate

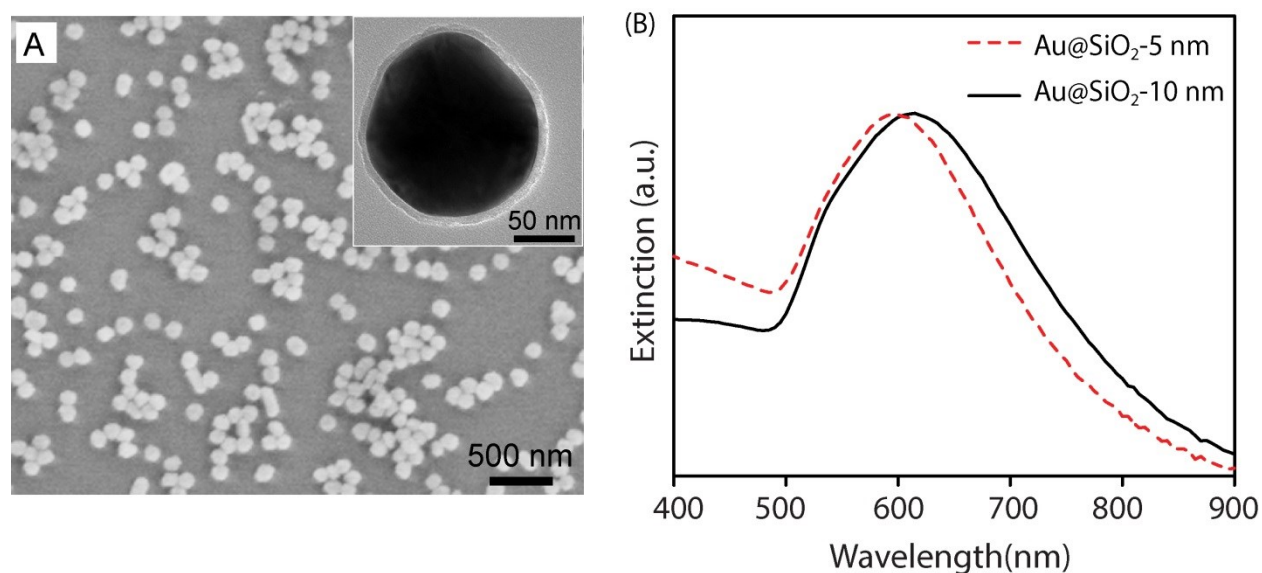

Figures S1. (A) SEM images of Au@SiO<sub>2</sub> NPs substrates with silica shell thickness of  $5 \pm 1$  nm. The insets in the figures are the corresponding high resolution TEM images of the Au@SiO<sub>2</sub> NPs. (B) Extinction spectra of Au@SiO<sub>2</sub>-5nm(red) and Au@SiO<sub>2</sub>-10nm(black) nanoparticles in water.

The LSPR of Au@SiO<sub>2</sub>-5 nm peaks at 597 nm and Au@SiO<sub>2</sub>-10 nm peaks at 612 nm. The LSPR of Au@SiO<sub>2</sub>-10 nm is red-shifted (15 nm) from that of Au@SiO<sub>2</sub>-5 nm, because the local dielectric constant of the Au NP is increased when the silica shell is thicker.

3. Blinking traces and  $g^2(\tau)$  data and “on”/ “off” times distribution of of a QD on Au@SiO<sub>2</sub>-5 nm substrate

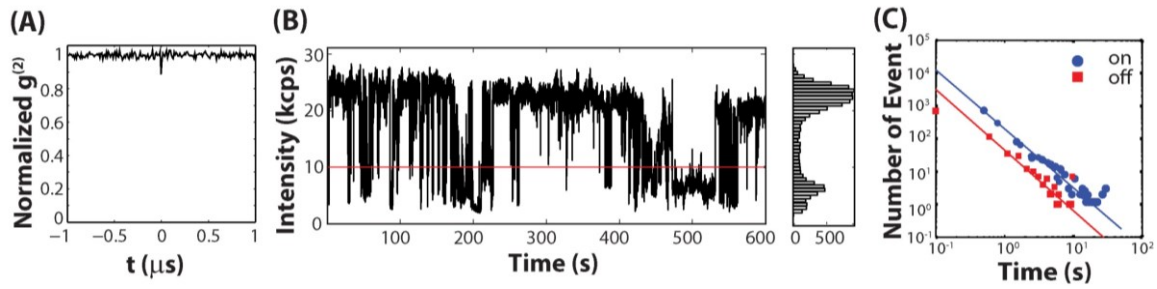

Figure S2. Representative  $g^{(2)}$  measurements (A) blinking traces (B) and log-log plots of the “on,” “off” time statistics of QDs (C) on Au@SiO<sub>2</sub>-5nm. Histograms indicating the distribution of intensities observed in the time trace.

4. Blinking traces and  $g^2(\tau)$  data of the representative single QDs on glass substrate

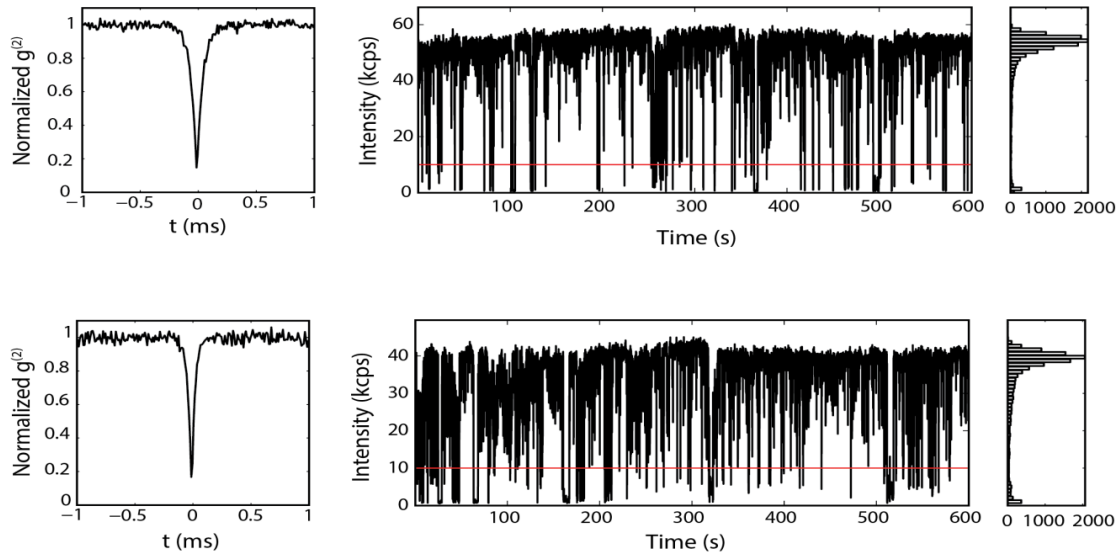

Figure S3. Representative  $g^{(2)}$  measurements and corresponding blinking traces of single QDs on glass.

5. Blinking traces and  $g^2(\tau)$  data of the representative single QDs on Au@SiO<sub>2</sub>-5nm substrate

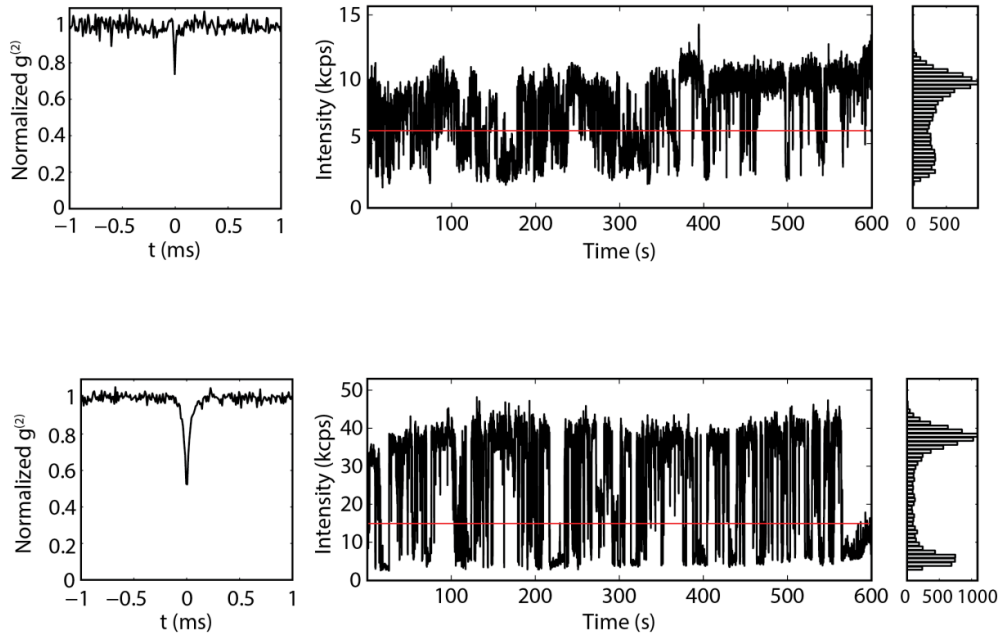

Figure S4. Representative  $g^{(2)}$  measurements and corresponding blinking traces of single QDs on Au@SiO<sub>2</sub>-5nm substrate.

6. Blinking traces and  $g^2(\tau)$  data of the representative single QDs on Au@SiO<sub>2</sub>-10nm substrate

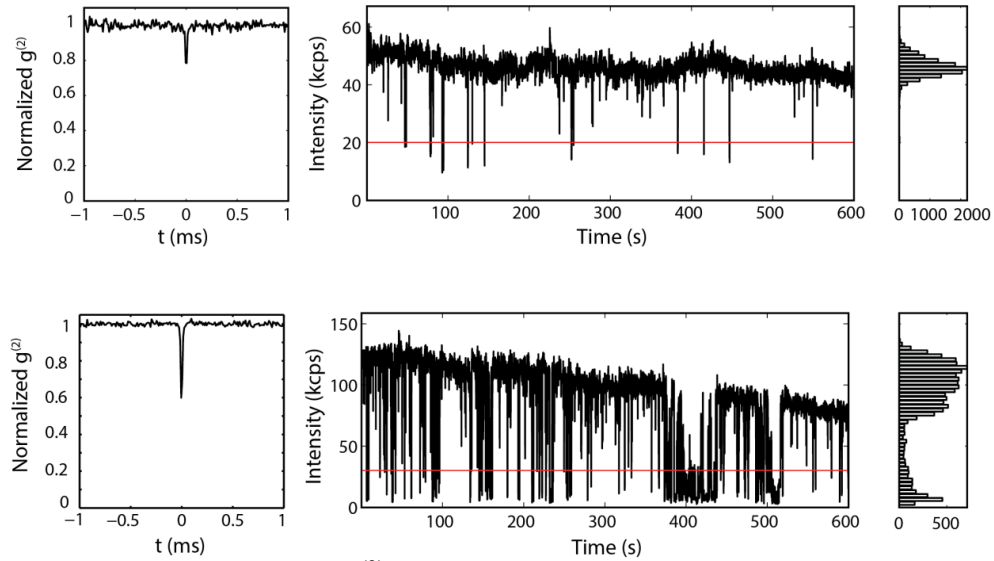

Figure S5. Representative  $g^{(2)}$  measurements and corresponding blinking traces of single QDs on Au@SiO<sub>2</sub>-10nm substrate.

## 7. Blinking Statistics

The PL blinking traces and intensity histograms of single QDs (shown in Figure 3B, 3E and S1-B) clearly demonstrate that the QDs all exhibit a two-state blinking with well-defined “on” and “off” states whether they are on glass or Au@SiO<sub>2</sub> NPs. The red lines in these denote the threshold between the “on” and “off” events. For quantitative analysis, the corresponding statistics of “on” and “off” times are calculated from the blinking traces and plotted in Figure 3B, 3E and S1-B. The lines in the plots are the power-law fit for the “on”/ “off” statistics. All the distributions for “on” and “off” event durations fit well to power-law distribution where *Number of events*  $\propto t_{on/off}^{-\alpha_{on/off}}$ . In the power-law function,  $t_{on/off}$  represents the time intervals that a QD stays in an “on” or “off” state, and  $\alpha_{on/off}$  represents the power-law exponents. For the CdSe/CdS QDs on glass,  $\alpha_{on} = 0.85$  and  $\alpha_{off} = 1.5$ . The small  $\alpha_{on}$  for the QDs is consistent with previous study and showing that the QDs have long “on” times. When the QDs were adsorbed on Au@SiO<sub>2</sub> NP substrates, the “on”/“off” statistics still follows power-law distribution but values of  $\alpha_{on/off}$  have changed. And more interestingly, the values of  $\alpha_{on}$  and  $\alpha_{off}$  are similar for the QDs on Au@SiO<sub>2</sub> NP. The calculated  $\alpha_{on/off}$  for QDs on Au@SiO<sub>2</sub> NP with  $\sim 5$  nm silica shell are  $\alpha_{on} = 1.8$  and  $\alpha_{off} = 1.85$ ; and for QDs on Au@SiO<sub>2</sub> NP with  $\sim 10$  nm silica shell, both  $\alpha_{on}$  and  $\alpha_{off}$  are 1.5. The dwell times for the “on”/“off” events of the single QDs are altered by the presence of the Au NPs, especially the “on” events. The results indicate the plasmonic structures may be used to modify the photo darkening process in QD films, important for their application in light emitting devices.

8.  $g^2(\tau)$  dip value distribution for QDs on Au@SiO<sub>2</sub>-5nm substrate

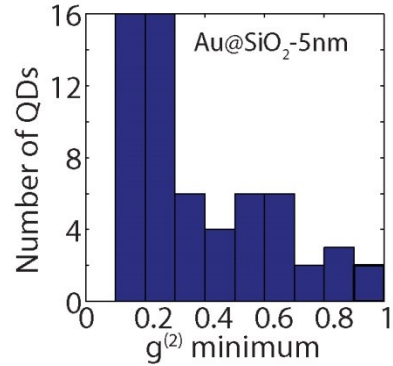

Figure S6. Histograms of the minimum  $g^2$  data of single QDs on Au@SiO<sub>2</sub>-5nm.

The difference in the  $g^2(\tau)$  values distribution of QDs on Au@SiO<sub>2</sub> NP substrates may be related to how the Au@SiO<sub>2</sub> NPs were distributed on glass. We reexamined the SEM images of the Au@SiO<sub>2</sub>-5 nm (Figure S2-A) and Au@SiO<sub>2</sub>-10 nm (Figure 1C) substrates. It is clear from the SEM images of the Au@SiO<sub>2</sub>-5 nm and Au@SiO<sub>2</sub>-10 nm substrates that the packing density of the Au@SiO<sub>2</sub> NPs is different on those two substrates. The Au@SiO<sub>2</sub>-5 nm substrate has much more void space without the NPs compared to the Au@SiO<sub>2</sub>-10 nm substrate. A quantitative analysis revealed the packing density of the NPs on the Au@SiO<sub>2</sub>-5 nm substrate is 60% lower than that of the Au@SiO<sub>2</sub>-10 nm substrate. Since the QDs were randomly spin-coated on the substrates, there is a much higher chance for the QDs to fall on empty glass than on the Au@SiO<sub>2</sub>-5 nm substrate. Since plasmonic effect is near-field in nature and decays fast from the metal surface, the X and BX emission of the QDs with a large distance from the NPs is much less affected than the QDs close to or on the NPs. The QDs with  $g^2(\tau)$  dip values of 0.1-0.2 are likely to be situated far from the NPs thus behave like the QDs on bare glass. The two population of QDs lead to the broad distribution of  $g^2(\tau)$  dip values. We also show in the calculations that not only the distance between the QD and NP, but also the relative position and the orientation of the QD/NP complex determines the exciton-plasmon coupling strength.

## 9. Ensemble PL decay

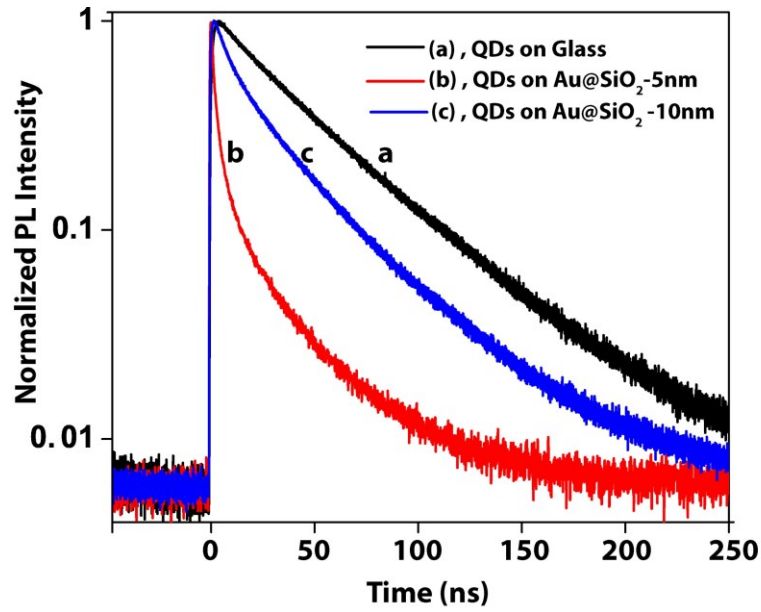

Figure S7. Ensemble PL decay CdSe/CdS QDs on different substrates (a) on glass (b) on Au@SiO<sub>2</sub>-5nm (c) on Au@SiO<sub>2</sub>-10nm.

The PL decay of the QDs on glass (Figure S7, a-black curve) fits well with a bi-exponential decay function of  $y = 2.23e^{-t/25.4} + 1.83e^{-t/53.2}$ . For the QDs on Au@SiO<sub>2</sub>-5 nm, the PL decay ((Figure S7, b-red line) fits with  $y = 5.81 \times 10^4 e^{-t/4.03} + 0.69e^{-t/28.8}$ . For the QDs on Au@SiO<sub>2</sub>-10 nm, the PL decay (Figure S7, c-blue line) fits with  $y = 2.49 \times 10^2 e^{-t/8.28} + 1.57e^{-t/45.5}$ . The fittings show that for the QDs on MNP substrate, the decay process was dominated by a fast decay at shorter times and there was also a much slower decay at longer times.

## 10. Calculations of distance-dependent BX QY/X QY

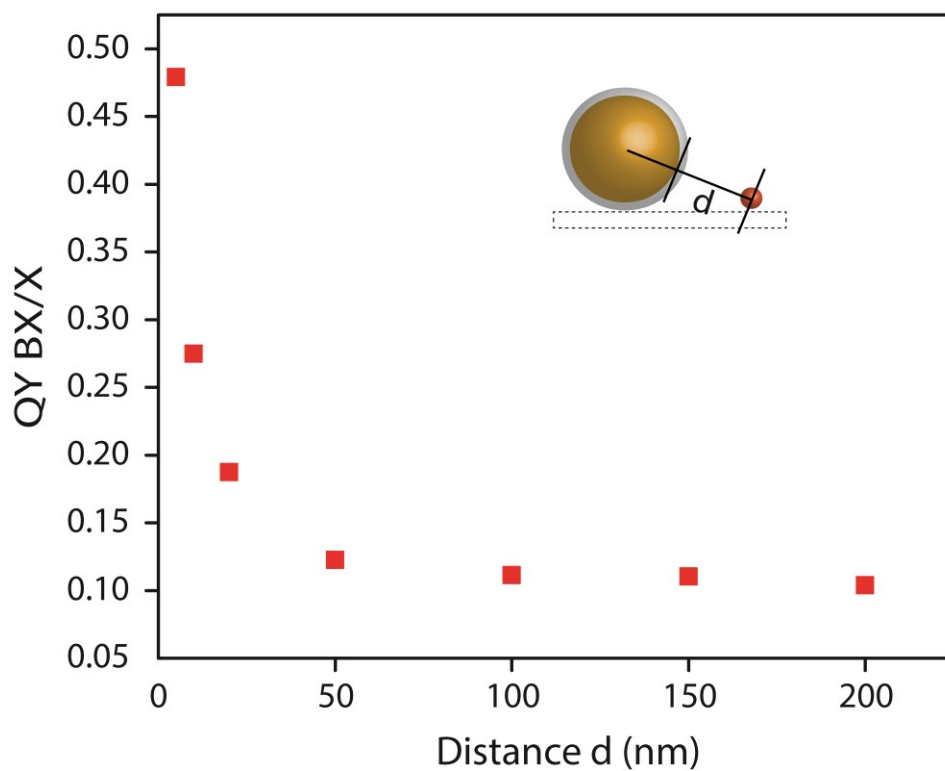

Figure S8. Calculated interparticle distance dependent ratio of BX QY to X QY of a single QD near an Au@SiO<sub>2</sub> nanoparticle. The scheme shows how distance  $d$  is defined in the calculations.

Table S1. Theoretical results of the averaged X, BX intensity, lifetime and quantum yield of a QD on a Au@SiO<sub>2</sub> monomer with varying incident polarization angle

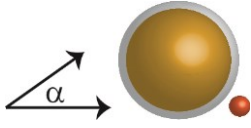

|                      | Silica shell thickness = 5 nm |      |      |      |      | Average |
|----------------------|-------------------------------|------|------|------|------|---------|
| $\alpha$             | 0                             | 30   | 45   | 60   | 90   |         |
| $ E ^2$              | 2.01                          | 1.87 | 1.73 | 1.59 | 1.45 | 1.73    |
| Rel. X PL Intensity  | 0.75                          | 0.64 | 0.52 | 0.38 | 0.24 | 0.50    |
| Rel. BX PL Intensity | 7.83                          | 5.85 | 4.11 | 2.60 | 1.31 | 4.34    |
| Rel. X PL lifetime   | 0.10                          | 0.11 | 0.12 | 0.15 | 0.17 | 0.13    |
| Rel. BX PL lifetime  | 0.51                          | 0.54 | 0.58 | 0.62 | 0.67 | 0.58    |
| X PL QY              | 0.35                          | 0.32 | 0.28 | 0.23 | 0.15 | 0.27    |
| BX PL QY             | 0.19                          | 0.17 | 0.14 | 0.10 | 0.06 | 0.13    |
| Ratio (BX QY/ X QY)  | 0.55                          | 0.52 | 0.48 | 0.45 | 0.40 | 0.48    |

|                      | Silica shell thickness = 10 nm |      |      |      |      | Average |
|----------------------|--------------------------------|------|------|------|------|---------|
| $\alpha$             | 0                              | 30   | 45   | 60   | 90   |         |
| $ E ^2$              | 1.74                           | 1.68 | 1.63 | 1.57 | 1.52 | 1.63    |
| Rel. X PL Intensity  | 1.02                           | 0.93 | 0.83 | 0.70 | 0.53 | 0.80    |
| Rel. BX PL Intensity | 5.82                           | 4.68 | 3.58 | 2.52 | 1.49 | 3.62    |
| Rel. X PL lifetime   | 0.22                           | 0.26 | 0.30 | 0.37 | 0.48 | 0.33    |
| Rel. BX PL lifetime  | 0.73                           | 0.77 | 0.81 | 0.85 | 0.90 | 0.81    |
| X PL QY              | 0.55                           | 0.52 | 0.48 | 0.43 | 0.33 | 0.47    |
| BX PL QY             | 0.19                           | 0.16 | 0.14 | 0.10 | 0.07 | 0.13    |
| Ratio (BX QY/ X QY)  | 0.35                           | 0.31 | 0.28 | 0.24 | 0.20 | 0.27    |

Table S2. Theoretical results of the averaged X, BX intensity, lifetime and quantum yield of a QD on a Au@SiO<sub>2</sub> dimer with varying angle of QD relative to the Au-Au NP center axis. The incident polarization is either parallel or perpendicular to the Au-Au NP center axis.

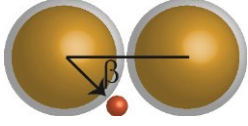

|                          | Silica shell thickness = 5 nm  |      |      |      |      |      |      |      |      | Average |
|--------------------------|--------------------------------|------|------|------|------|------|------|------|------|---------|
| $\beta$                  | 0                              | 30   | 45   | 60   | 90   | 120  | 135  | 150  | 180  |         |
| $ E ^2$ (  )             | 1.69                           | 1.64 | 1.60 | 1.55 | 1.76 | 1.93 | 2.07 | 2.21 | 1.78 | 1.96    |
| ( $\perp$ )              | 1.79                           | 2.00 | 2.20 | 2.39 | 2.54 | 2.34 | 2.17 | 2.02 | 1.88 |         |
| Rel. X PL Int (  )       | 0.86                           | 0.77 | 0.64 | 0.45 | 0.25 | 0.54 | 0.71 | 0.83 | 0.94 | 0.70    |
| ( $\perp$ )              | 0.38                           | 0.65 | 0.86 | 1.04 | 1.13 | 0.88 | 0.72 | 0.57 | 0.43 |         |
| Rel. BX PL Int (  )      | 7.16                           | 5.63 | 4.00 | 2.35 | 1.07 | 3.25 | 5.15 | 7.00 | 9.00 | 5.64    |
| ( $\perp$ )              | 1.93                           | 4.37 | 7.34 | 10.6 | 12.8 | 8.16 | 5.62 | 3.77 | 2.33 |         |
| Rel. X PL lifetime (  )  | 0.11                           | 0.14 | 0.17 | 0.23 | 0.30 | 0.22 | 0.19 | 0.16 | 0.15 | 0.20    |
| ( $\perp$ )              | 0.29                           | 0.22 | 0.18 | 0.15 | 0.14 | 0.17 | 0.20 | 0.24 | 0.28 |         |
| Rel. BX PL lifetime (  ) | 0.54                           | 0.59 | 0.66 | 0.73 | 0.79 | 0.72 | 0.67 | 0.64 | 0.61 | 0.68    |
| ( $\perp$ )              | 0.79                           | 0.72 | 0.66 | 0.62 | 0.59 | 0.65 | 0.69 | 0.74 | 0.78 |         |
| X PL QY (  )             | 0.48                           | 0.45 | 0.38 | 0.28 | 0.15 | 0.29 | 0.35 | 0.38 | 0.40 | 0.36    |
| ( $\perp$ )              | 0.21                           | 0.32 | 0.39 | 0.44 | 0.44 | 0.38 | 0.33 | 0.28 | 0.23 |         |
| BX PL QY (  )            | 0.25                           | 0.21 | 0.16 | 0.10 | 0.05 | 0.10 | 0.14 | 0.16 | 0.18 | 0.14    |
| ( $\perp$ )              | 0.06                           | 0.11 | 0.15 | 0.18 | 0.20 | 0.15 | 0.12 | 0.09 | 0.07 |         |
| Ratio(BXQY/XQY) (  )     | 0.52                           | 0.47 | 0.41 | 0.35 | 0.29 | 0.36 | 0.40 | 0.43 | 0.45 | 0.39    |
| ( $\perp$ )              | 0.30                           | 0.36 | 0.41 | 0.45 | 0.47 | 0.42 | 0.38 | 0.34 | 0.30 |         |
|                          | Silica shell thickness = 10 nm |      |      |      |      |      |      |      |      | Average |
| $\beta$                  | 0                              | 30   | 45   | 60   | 90   | 120  | 135  | 150  | 180  |         |
| $ E ^2$ (  )             | 1.54                           | 1.54 | 2.15 | 1.56 | 1.63 | 1.80 | 1.89 | 1.98 | 2.05 | 1.90    |
| ( $\perp$ )              | 2.00                           | 2.08 | 2.15 | 2.22 | 2.23 | 2.10 | 2.03 | 1.96 | 1.90 |         |
| Rel. X PL Int (  )       | 0.97                           | 0.92 | 0.84 | 0.72 | 0.54 | 0.83 | 0.99 | 1.10 | 1.20 | 0.96    |
| ( $\perp$ )              | 0.68                           | 0.97 | 1.15 | 1.28 | 1.31 | 1.13 | 1.00 | 0.88 | 0.74 |         |
| Rel. BX PL Int (  )      | 5.17                           | 4.33 | 3.39 | 2.36 | 1.45 | 3.15 | 4.56 | 5.92 | 7.31 | 4.67    |
| ( $\perp$ )              | 2.12                           | 4.15 | 6.20 | 8.11 | 8.99 | 6.26 | 4.71 | 3.46 | 2.37 |         |
| Rel. X PL lifetime (  )  | 0.21                           | 0.26 | 0.32 | 0.43 | 0.58 | 0.43 | 0.35 | 0.30 | 0.27 | 0.38    |
| ( $\perp$ )              | 0.61                           | 0.44 | 0.34 | 0.28 | 0.26 | 0.32 | 0.38 | 0.45 | 0.56 |         |
| Rel. BX PL lifetime (  ) | 0.71                           | 0.76 | 0.81 | 0.87 | 0.93 | 0.87 | 0.83 | 0.80 | 0.77 | 0.83    |
| ( $\perp$ )              | 0.93                           | 0.87 | 0.82 | 0.78 | 0.76 | 0.81 | 0.84 | 0.88 | 0.92 |         |
| X PL QY (  )             | 0.60                           | 0.57 | 0.36 | 0.44 | 0.31 | 0.44 | 0.49 | 0.53 | 0.55 | 0.48    |
| ( $\perp$ )              | 0.32                           | 0.45 | 0.50 | 0.54 | 0.56 | 0.50 | 0.47 | 0.43 | 0.37 |         |
| BX PL QY (  )            | 0.22                           | 0.18 | 0.14 | 0.10 | 0.05 | 0.10 | 0.13 | 0.15 | 0.17 | 0.13    |
| ( $\perp$ )              | 0.05                           | 0.10 | 0.13 | 0.17 | 0.18 | 0.14 | 0.11 | 0.09 | 0.06 |         |
| Ratio(BXQY/XQY) (  )     | 0.37                           | 0.32 | 0.27 | 0.22 | 0.17 | 0.22 | 0.26 | 0.29 | 0.31 | 0.25    |
| ( $\perp$ )              | 0.16                           | 0.22 | 0.26 | 0.30 | 0.32 | 0.28 | 0.24 | 0.21 | 0.18 |         |

## References:

- 1) Leatherdale, C. A.; Woo, W. K.; Mikulec, F. V.; and Bawendi, M. G., *J. Phys. Chem. B*, **2002**, *106*, 7619.
- 2) Park, Y.-S.; Klimov, V. I. and Htoon, H, *Phys.Rev.Lett.*, **2011**, *106*, 18, 187401.
- 3) Zhao, J; Chen, O; Strasfeld, D. B and Bawendi,M.G., *Nano Lett.*, **2012**, *12*, 4477.
- 4) *Handbook of Optical Constants II*, Palik, E.D., Academic Press, Boston, **1991**.
- 5) Chen, O.; Zhao, J.; Chauhan, V. P.; Cui, J.; Wong, C.; Harris, D. K.; Wei, H.; Han, H.-S.; Fukumura, D.; Jain, R. K.; Bawendi, M. G. *Nat. Mater.* 2013, *12*, 445-451.
